# Supplementary material
Source: PubMed Central journal article supplement (PMC4138403)

Supplementary Figure 1 Daito *et al.*

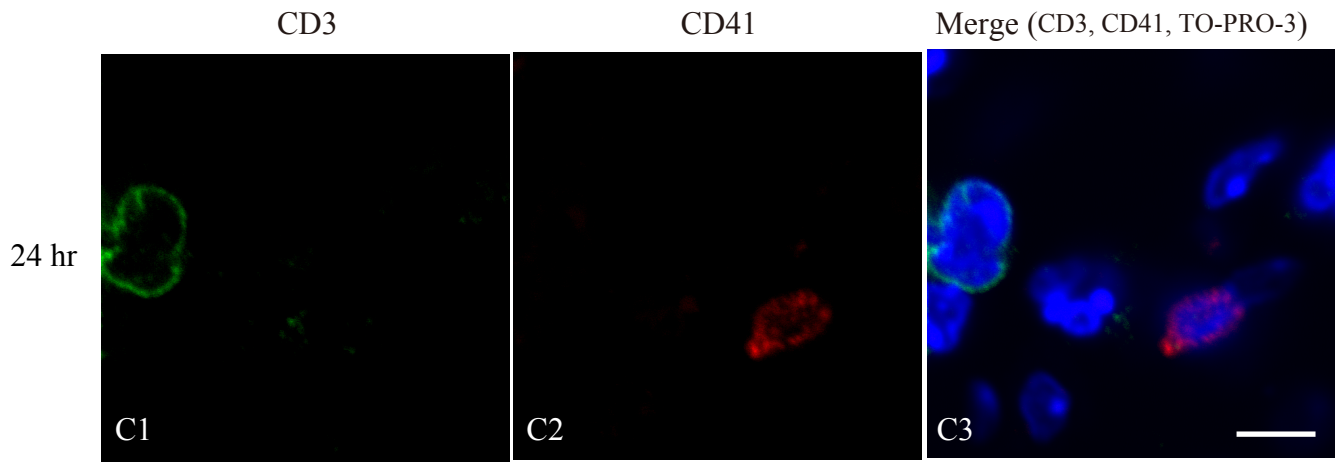

Supplement: AHC14013-S1.pdf [file AHC14013-S1.pdf]
